# Supplementary material
Source: PubMed Central journal article supplement (PMC2945229)
Supplement: NIHMS220084-supplement-1.pdf [file NIHMS220084-supplement-1.pdf]

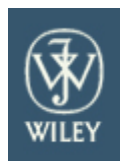

## KIF1A and EDNRB are differentially methylated in primary HNSCC and salivary rinses

|                               |                                                                                                                                                                                                                                                                                                                                                                                                                                                                                                                                                                                                                                                                                                                                                                                                                                                                                                                                                                                                                                                                                                                                                                                                                                                                                                                                                                                                                                                                                                                                                                                                                                                                                                                                                                                                                                                                                           |
|-------------------------------|-------------------------------------------------------------------------------------------------------------------------------------------------------------------------------------------------------------------------------------------------------------------------------------------------------------------------------------------------------------------------------------------------------------------------------------------------------------------------------------------------------------------------------------------------------------------------------------------------------------------------------------------------------------------------------------------------------------------------------------------------------------------------------------------------------------------------------------------------------------------------------------------------------------------------------------------------------------------------------------------------------------------------------------------------------------------------------------------------------------------------------------------------------------------------------------------------------------------------------------------------------------------------------------------------------------------------------------------------------------------------------------------------------------------------------------------------------------------------------------------------------------------------------------------------------------------------------------------------------------------------------------------------------------------------------------------------------------------------------------------------------------------------------------------------------------------------------------------------------------------------------------------|
| Journal:                      | <i>International Journal of Cancer</i>                                                                                                                                                                                                                                                                                                                                                                                                                                                                                                                                                                                                                                                                                                                                                                                                                                                                                                                                                                                                                                                                                                                                                                                                                                                                                                                                                                                                                                                                                                                                                                                                                                                                                                                                                                                                                                                    |
| Manuscript ID:                | IJC-09-2307                                                                                                                                                                                                                                                                                                                                                                                                                                                                                                                                                                                                                                                                                                                                                                                                                                                                                                                                                                                                                                                                                                                                                                                                                                                                                                                                                                                                                                                                                                                                                                                                                                                                                                                                                                                                                                                                               |
| Wiley - Manuscript type:      | Early Detection and Diagnosis                                                                                                                                                                                                                                                                                                                                                                                                                                                                                                                                                                                                                                                                                                                                                                                                                                                                                                                                                                                                                                                                                                                                                                                                                                                                                                                                                                                                                                                                                                                                                                                                                                                                                                                                                                                                                                                             |
| Date Submitted by the Author: | 28-Sep-2009                                                                                                                                                                                                                                                                                                                                                                                                                                                                                                                                                                                                                                                                                                                                                                                                                                                                                                                                                                                                                                                                                                                                                                                                                                                                                                                                                                                                                                                                                                                                                                                                                                                                                                                                                                                                                                                                               |
| Complete List of Authors:     | Demokan, Semra; The Johns Hopkins University School of Medicine, Head and Neck Cancer Research Division,, Department of Otolaryngology - Head and Neck Surgery<br>Chang, Xiaofei; The Johns Hopkins University School of Medicine, Head and Neck Cancer Research Division,, Department of Otolaryngology - Head and Neck Surgery<br>Chuang, Alice; The Johns Hopkins University School of Medicine, Department of Dermatology<br>Mydlarz, Wojciech K; The Johns Hopkins University School of Medicine, Head and Neck Cancer Research Division,, Department of Otolaryngology - Head and Neck Surgery<br>Kaur, Jatinder; All India Institute of Medical Sciences, Ansari Nagar, Department of Biochemistry<br>Huang, Peng; Johns Hopkins University, School of Medicine, Department of Oncology Biostatistics<br>Khan, Zubair; The Johns Hopkins University School of Medicine, Head and Neck Cancer Research Division,, Department of Otolaryngology - Head and Neck Surgery<br>Khan, Tanbir; The Johns Hopkins University School of Medicine, Head and Neck Cancer Research Division,, Department of Otolaryngology - Head and Neck Surgery<br>Ostrow, Kimberly L; The Johns Hopkins University School of Medicine, Head and Neck Cancer Research Division,, Department of Otolaryngology - Head and Neck Surgery<br>Brait, Mariana; The Johns Hopkins University School of Medicine, Head and Neck Cancer Research Division,, Department of Otolaryngology - Head and Neck Surgery<br>Hoque, Mohammad O; The Johns Hopkins University School of Medicine, Head and Neck Cancer Research Division,, Department of Otolaryngology - Head and Neck Surgery<br>Liegeois, Nanette J; The Johns Hopkins University School of Medicine, Department of Dermatology<br>Sidransky, David; The Johns Hopkins University School of Medicine, Head and Neck Cancer Research Division,, Department of |

1  
2  
3  
4  
5  
6  
7  
8  
9  
10  
11  
12  
13  
14  
15  
16  
17  
18  
19  
20  
21  
22  
23  
24  
25  
26  
27  
28  
29  
30  
31  
32  
33  
34  
35  
36  
37  
38  
39  
40  
41  
42  
43  
44  
45  
46  
47  
48  
49  
50  
51  
52  
53  
54  
55  
56  
57  
58  
59  
60

|            |                                                                                                                                                                                                                                                                                                                                                                                                                                                         |
|------------|---------------------------------------------------------------------------------------------------------------------------------------------------------------------------------------------------------------------------------------------------------------------------------------------------------------------------------------------------------------------------------------------------------------------------------------------------------|
|            | <p>Otolaryngology - Head and Neck Surgery<br/>         Koch, Wayne; The Johns Hopkins University School of Medicine,<br/>         Head and Neck Cancer Research Division,, Department of<br/>         Otolaryngology - Head and Neck Surgery<br/>         Califano, Joseph; The Johns Hopkins University School of Medicine,<br/>         Head and Neck Cancer Research Division, Department of<br/>         Otolaryngology - Head and Neck Surgery</p> |
| Key Words: | Methylation, Saliva, head and neck cancer, KIF1A, EDNRB                                                                                                                                                                                                                                                                                                                                                                                                 |
|            |                                                                                                                                                                                                                                                                                                                                                                                                                                                         |

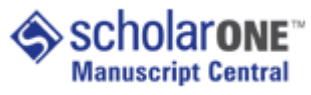

For Peer Review

***KIF1A* and *EDNRB* are differentially methylated  
in primary HNSCC and salivary rinses**

Semra Demokan<sup>1</sup>, Xiaofei Chang<sup>1</sup>, Alice Chuang<sup>2</sup>, Wojciech K. Mydlarz<sup>1</sup>, Jatinder Kaur<sup>3</sup>, Peng Huang<sup>4</sup>, Zubair Khan<sup>1</sup>, Tanbir Khan<sup>1</sup>, Kimberly L. Ostrow<sup>1</sup>, Mariana Brait<sup>1</sup>, Mohammad O. Hoque<sup>1</sup>, Nanette J. Liegeois<sup>2</sup>, David Sidransky<sup>1</sup>, Wayne Koch<sup>1</sup>, Joseph A. Califano<sup>1</sup>.

<sup>1</sup>Department of Otolaryngology-Head and Neck Surgery, <sup>2</sup>Department of Dermatology, <sup>4</sup>Department of Oncology Biostatistics, Johns Hopkins University, School of Medicine, Baltimore, MD; <sup>3</sup>Department of Biochemistry, All India Institute of Medical Sciences, Ansari Nagar, New Delhi, 110029, India.

Corresponding author:

Joseph A. Califano

Department of Otolaryngology-Head and Neck Surgery

Johns Hopkins Medical Institutions

1550 Orleans Street, Room 5N.04

Baltimore, Maryland 21231

Phone: 410-502-5133

Fax: 1-410-614-1411

E-mail: [jcalifa@jhmi.edu](mailto:jcalifa@jhmi.edu)

Milton J. Dance Head and Neck Center

Greater Baltimore Medical Center

Baltimore, Maryland

**Financial Disclosures:** No conflicts of interest exist.

**Keywords:** Methylation, saliva, head and neck cancer, *KIF1A*, *EDNRB*

**Running title:** Methylation of *KIF1A* and *EDNRB* in Saliva of HNSCC patients.

**Abbreviations:**

*EDNRB*: endothelin receptor type B; *KIF1A*: kinesin chain member 1A, HNSCC: head and neck squamous-cell carcinoma; Q-MSP: quantitative methylation-specific PCR.

**Statement of Translational Relevance**

DNA methylation biomarkers detection in salivary rinse samples have great potential to be developed as a non-invasive tool for head and neck cancer early diagnosis. We have previously reported frequent methylation of another panel of methylation markers in salivary rinses of patients with head and neck cancer. In this study, methylation of two genes, *KIF1A* and *EDNRB*, were shown to be methylated primary head and neck cancer, and highly specific markers for head and neck cancer in salivary rinses from head and neck cancer patients.

**ABSTRACT**

Silencing of tumor suppressor genes plays a vital role in head and neck carcinogenesis. In this study we aimed to evaluate the utility of aberrant promoter hypermethylation for detection in a panel of 10 genes (*KIF1A*, *EDNRB*, *CDH4*, *TERT*, *CD44*, *NISCH*, *PAK3*, *VGF*, *MAL* and *FKBP4*) head and neck squamous cell carcinoma (HNSCC) via a candidate gene approach. We investigated methylation of the gene promoters by bisulfite modification and quantitative methylation-specific PCR (Q-MSP) in a preliminary study of a limited cohort of salivary rinses from healthy subjects (n=61) and patients with HNSCC (n=33). The methylation status of two selected genes (*EDNRB* and *KIF1A*) were then analyzed in fifteen normal mucosa samples from a healthy population, 101 HNSCC tumors and the corresponding salivary rinses from 71 out of the 101 HNSCC patients were collected prior to treatment. The promoter regions of *CDH4*, *TERT*, *VGF*, *MAL*, *FKBP4*, *NISCH* and *PAK3* were methylated in normal salivary rinses while no methylation of *CD44* was observed in either normal salivary rinses or tumor samples. However, *KIF1A* and *EDNRB* were methylated in 98% and 97% of primary HNSCC tissues respectively and were only methylated in 2% and 6.6% of normal salivary rinses. In addition, *KIF1A* and *EDNRB* were methylated in 38% and 67.6% of salivary rinses from HNSCC patients, respectively. Promoter hypermethylation of *KIF1A* and *EDNRB* is a frequent event in primary HNSCC and these genes are preferentially methylated in salivary rinses from HNSCC patients. *KIF1A* and *EDNRB* are potential biomarkers for HNSCC detection.

## INTRODUCTION

Among human malignancies, head and neck cancer is the sixth most common cancer in the world <sup>1</sup>. More than 40,000 new cases of head and neck squamous cell carcinoma (HNSCC) are diagnosed in the United States each year, with a mortality rate of 12,000 U.S. deaths annually. Survival rates have not improved significantly for patients with HNSCC in the past thirty years despite active clinical and basic science research addressing this issue. Molecular detection of HNSCC in body fluids has the potential to improve post-treatment surveillance, provide prognostic information, and influence therapy. Body fluids can potentially carry whole cells as well as protein, DNA, and RNA species that allow for detection of cellular alterations related to cancer. In previous studies, body fluids such as sputum for lung cancer <sup>2</sup>, urine for urologic tumors <sup>3</sup>, salivary rinses for HNSCC <sup>4-7</sup>, and breast fluid for breast cancer <sup>8</sup> have been used in multiple detection strategies <sup>9-13</sup>.

Silencing of tumor suppressor genes by means of promoter hypermethylation plays a role in head and neck carcinogenesis <sup>5</sup>. Measuring promoter hypermethylation by using real time quantitative methylation-specific PCR (Q-MSP) allows an objective, robust, and rapid assessment of promoter methylation status. The ability to quantify methylation provides the potential for determination of a clinically meaningful threshold value of methylation to improve sensitivity and specificity in detection of tumor-specific signals <sup>14-17</sup>.

In this study we evaluated the epigenetic changes in head and neck squamous cell carcinoma (HNSCC) by investigating promoter hypermethylation in a panel of ten genes (*KIF1A*, *EDNRB*, *CDH4*, *TERT*, *CD44*, *NISCH*, *PAK3*, *VGF*, *MAL* and *FKBP4*) via a

1  
2  
3 candidate gene approach. We sought to determine if a novel panel of promoter  
4  
5  
6 hypermethylation markers would result in an improved ability to detect epigenetic  
7  
8 changes associated with HNSCC in salivary rinses from patients with HNSCC.  
9

10  
11 In this study, we were able to show differential promoter hypermethylation in HNSCC  
12  
13 patients compared with normal individuals' salivary rinses. We then compared promoter  
14  
15 hypermethylation of *KIF1A* with that of *EDNRB*, finding a significant association  
16  
17 between methylation of promoter regions of these genes. Promoter hypermethylation for  
18  
19 both of these genes was then examined for association with clinical parameters.  
20  
21  
22  
23

## 24 **MATERIALS AND METHODS**

### 25 **Samples**

26  
27  
28 After institutional review board approval, and obtaining appropriate informed  
29  
30 consent, the patients and control population from healthy subjects enrolled in a  
31  
32 community screening study were recruited from the Johns Hopkins School of Medicine,  
33  
34 Department of Otolaryngology-Head and Neck Surgery. 101 tumor and the  
35  
36 corresponding pretreatment salivary rinse samples collected before any treatment for 71  
37  
38 of these tumors were obtained from HNSCC patients. For the control population, 61  
39  
40 salivary rinse samples and 15 normal mucosal tissue samples from a healthy cohort were  
41  
42 collected. All subjects were administered a confidential written survey of risk factors for  
43  
44 upper aerodigestive tract malignancies, including alcohol and tobacco. Smoking was  
45  
46 defined as use of tobacco, chewable or smoked, for at least 1 year continuously. Alcohol  
47  
48 use was defined as intake of more than two alcoholic drinks per day. In this study  
49  
50 salivary rinses were obtained by brushing oral cavity and oropharyngeal surfaces with an  
51  
52  
53  
54  
55  
56  
57  
58  
59  
60

1  
2  
3 exfoliating brush followed by rinse and gargle with 20 mL normal saline solution. The  
4  
5 brush was gently agitated to release the obtained material into saline. After  
6  
7 centrifugation, the supernatant was discarded and DNA was isolated from the pellet.  
8  
9 Tumors were snap frozen and microdissected on a cryostat to at least 75% purity. DNA  
10  
11 from 61 salivary rinse samples from noncancer individuals were analyzed as a control, to  
12  
13 investigate the normal promoter methylation status of *KIF1A* (n=47), *EDNRB* (n=45),  
14  
15 *CDH4* (n=20), *TERT* (n=46), *CD44* (n=46), *NISCH* (n=46), *PAK3* (n=46), *VGF* (n=21),  
16  
17 *MAL* (n=21) and *FKBP4* (n=21) genes. The methylation status of two selected genes,  
18  
19 *EDNRB* and *KIF1A*, were analyzed in 101 fresh tumors and 71 salivary rinse samples  
20  
21 from patients with head and neck cancer and 15 normal mucosa samples from healthy  
22  
23 individuals.  
24  
25  
26  
27  
28  
29  
30  
31

### 32 **DNA Extraction and Bisulfite Treatment**

33  
34 DNA was isolated as described previously<sup>7</sup>. In brief, DNA was obtained by  
35  
36 phenol/chloroform extraction after overnight incubation with proteinase K at 37°C. DNA  
37  
38 from tumor and control samples was subjected to bisulfite treatment using Epitect  
39  
40 Bisulfite Modification kit (Qiagen, Valencia, CA) as per the manufacture's protocol.  
41  
42  
43  
44  
45

### 46 **Bisulfite Sequencing**

47  
48 Bisulfite-treated DNA was amplified for the 5' region that included at least a  
49  
50 portion of the CpG island within 1-2 kb of the first exon of the genes, *CD44* and *CDH4*,  
51  
52 using primer sets (Table S1). The primers for bisulfite sequencing were designed to  
53  
54 hybridize to regions in the promoter without CpG dinucleotides. PCR products were gel-  
55  
56  
57  
58  
59  
60



1  
2  
3 purified using the QIAquick Gel Extraction Kit (Qiagen, Valencia, CA) according to the  
4  
5 manufacturer's instructions. Each amplified DNA sample was sequenced by the Applied  
6  
7 Biosystems 3700 DNA analyzer using nested, forward or reverse primers and BD  
8  
9 terminator dye (Applied Biosystems, Foster City, CA).  
10  
11

### 12 13 14 15 **Quantitative methylation specific PCR (QMSP)**

16  
17 Primers and probes were obtained from literature for *KIF1A*, *NISCH*, *PAK3*<sup>18</sup>,  
18  
19 *CD44* and *EDNRB*<sup>19</sup>, *TERT*<sup>20</sup>, *MAL*, *FKBP4* and *VGF*<sup>21</sup> genes, and the internal control  
20  
21 *β-actin* gene (*ACTB*)<sup>22</sup>, and are given in Supplementary Table S2. Primer and probe  
22  
23 sequences were determined by Methprimer program showing the CpG islands in the  
24  
25 promoter regions of *CDH4* gene after bisulfite sequencing (Table S2). Lymphocytes  
26  
27 obtained from a healthy individual were *in vitro* methylated using excess SssI  
28  
29 methyltransferase (New England Biolabs Inc., Beverly, MA) to generate completely  
30  
31 methylated DNA that was used as a positive control standard. To quantitate the relative  
32  
33 percent of methylation, we computed the ratio between the QMSP values of the gene of  
34  
35 interest relative to an internal control, *ACTB* (gene of interest/reference gene x 100).  
36  
37 Fluorogenic PCR is carried out in a reaction volume of 20 μL consisting of 600 nM of  
38  
39 each primer; 200 nM of probe; 0.6 U of platinum Taq polymerase (Invitrogen, Carlsbad,  
40  
41 CA); 200 μM of each dATP, dCTP, dGTP and dTTP; 1X Rox Dye reference and 1X  
42  
43 Buffer (16.6 mM of ammonium sulfate; 67 mM of Trizma (Sigma, St Louis, MO); 6.7  
44  
45 mM of Magnesium chloride; 10 mM of mercaptoethanol; and 0.1% dimethylsulfoxide).  
46  
47 Three microliters of bisulfite treated DNA were used in each real-time QMSP reaction.  
48  
49 Amplifications are carried out in 384-well plates in a 7900 Sequence Detector System  
50  
51  
52  
53  
54  
55  
56  
57  
58  
59  
60

1  
2  
3 (Perkin-Elmer Applied Biosystems, Norwalk, CT) and are analyzed by SDS 2.3  
4  
5 (Sequence Detector System) (Applied Biosystems). Each reaction was performed in  
6  
7  
8 triplicate.  
9

### 10 11 12 13 **Data Analysis**

14  
15 Statistical analyses were performed using S-PLUS® 8.0 for Windows Enterprise  
16  
17 Developer. Methylation levels of *KIF1A* and *EDNRB* between healthy subjects and  
18  
19 HNSCC patients were compared using Wilcoxon rank test. Spearman correlations  
20  
21 between *KIF1A* and *EDNRB* methylation level were calculated and tested against zero.  
22  
23 Binary indicators of *KIF1A* and *EDNRB* methylation in HNSCC patients` salivary rinses  
24  
25 were used to study their association with cancer mortality. Such associations were not  
26  
27 studied in tumor samples since all except 2 and 3 patients for *KIF1A* and *EDNRB*  
28  
29 respectively, had methylation in both genes. For each prognostic factor, proportional  
30  
31 hazards model was used to estimate the hazard ratio and the corresponding 95%  
32  
33 confidence interval (CI). P-values were obtained from the likelihood ratio test for  
34  
35 continuous covariates and log-rank test for binary covariates. A multivariate Cox  
36  
37 proportional hazards model was used to investigate the joint association of several risk  
38  
39 factors with cancer mortality. All tests were two-sided with significance level set at  
40  
41  
42  
43  
44  
45  
46  $p=0.05$ .  
47  
48  
49  
50  
51  
52  
53  
54  
55  
56  
57  
58  
59  
60

## RESULTS

### Clinicopathologic characteristics of control subjects and patients with HNSCC

Table 1 describes the sample populations used in this study. The ages of patients from which the normal mucosal samples were obtained are slightly lower than the population of head and neck cancer patients, mean ages 43 years (range, 22–65) and 57 years (range, 31–88), respectively. Both sample groups have a similar male and Caucasian predominance. Pre-treatment (n=71) and normal screening salivary (n=61) rinses cohort had similar sample sizes. Similarly, the patients from whom the normal screening salivary rinses were obtained were distinctly younger. The male and Caucasian predominance was less pronounced in the normal salivary rinse samples, and there was larger proportion of non-smokers (47% vs. 31%) and fewer current smokers (18% vs. 37%) within this group. Alcohol consumption of patients (n=71) and control population (n=61) in salivary rinse cohort was found 25% vs 18% for past alcohol consumers and 34% vs 49% for current consumers, respectively. For non-alcoholic group, the rates were similar as 23% for controls and 20% for patients.

Tumor patients were composed of those without tobacco history (33%), current smokers (31%) and those who had quit smoking (29%). Alcohol consumption in patients with tumor samples was found 20% for non-alcoholic patients, 20% for past alcohol consumers and 38% for current consumers. Tumor samples (n=101) were obtained from patients with Stage I (18%), Stage II (16%), Stage III (12%) and Stage IV (54%) lesions at the time of presentation. These were from primary tumors of the oral cavity (n=39), oropharynx (n=38), hypopharynx (n=5), larynx (n=15), maxillary sinus (n=2) and unknown primary/neck (n=2). Pre-treatment salivary rinses of cancer patients have

1  
2  
3 similar characteristics as they were obtained from a subset (n=71) of the same tumor  
4  
5 patient population.  
6  
7  
8  
9

### 10 **Initial screening of candidate genes**

11  
12 We aimed to evaluate the epigenetic changes specific to HNSCC by investigating  
13 promoter hypermethylation of a panel of ten genes that has been previously published to  
14 be highly methylated in other tumor types but not in normal tissues, via candidate gene  
15 approach<sup>18-21,23</sup>, by using Q-MSP. The promoter regions of *CDH4* (30%), *TERT* (19.6%),  
16  
17 *MAL* (95%), *FKBP4* (38%), *VGF* (95%), *NISCH* (100%) and *PAK3* (78%) genes were  
18  
19 mostly observed to be heavily methylated in normal salivary rinse samples, whereas only  
20  
21 three genes from our candidate gene group, *KIF1A* (2%), *EDNRB* (6.6%) and *CD44*  
22  
23 (4%), demonstrated a low rate and proportion of methylation (Figure 1).  
24  
25  
26  
27  
28  
29  
30  
31

32 We selected these three genes to investigate the presence and level of gene  
33 promoter methylation in 33 tumor specimens from patients in a limited cohort. We  
34 observed 88% (29/33) and 84.8% (28/33) methylation rates for *KIF1A* and *EDNRB*  
35  
36 respectively, in primary HNSCC, whereas no methylation in the promoter region of  
37  
38 *CD44* gene was observed (data not shown). In a further study, we expanded the patient  
39  
40 cohort from the original 33 tumors, to include 101 tumors and 61 normals and showed a  
41  
42 difference of methylation levels between normal salivary rinses and tumor samples for  
43  
44 both *EDNRB* and *KIF1A*. Normal salivary rinses demonstrated minimal methylation  
45  
46 levels (Figure 2).  
47  
48  
49  
50  
51  
52  
53  
54  
55  
56  
57  
58  
59  
60

### **Validation of HNSCC specific methylation in tissue samples (mucosa vs. tumor)**

The methylation status of two selected genes (*EDNRB* and *KIF1A*) were analyzed in 101 fresh tumors from a HNSCC patient cohort and normal mucosal samples from 15 healthy individuals (Figure 3). *KIF1A* and *EDNRB* promoters were frequently methylated in both tumor and normal mucosa samples, with the normal mucosa samples exhibiting very low levels of methylation when compared to tumor samples as seen in the significantly different mean and median methylation values for each cohort. *KIF1A* was methylated in 98% [99/101, mean±sd=18.57±2.53, median (range)=5.02 (0, 100)] and *EDNRB* in 97% [98/101, mean±sd =27±3.28, median (range)=10.4 (0, 114.9)] of tumor samples. In normal mucosa samples, *KIF1A* was methylated in 86.6% [13/15, mean±sd =1.76±0.62, median (range)=0.66 (0, 9.22)] and *EDNRB* in 93% [14/15, mean±sd =1.55±0.58, median (range)=0.49 (0, 8.42)] of samples, but at very low levels. Both *KIF1A* (p=0.0004, Wilcoxon rank test) and *EDNRB* (p<0.0001, Wilcoxon rank test) have higher methylation levels in tumor than normal mucosa (Figure 3).

### **Methylation in Salivary rinses from HNSCC patients and healthy control subjects**

The methylation status of two selected genes (*EDNRB* and *KIF1A*) were analyzed in 71 salivary rinses of patients with head and neck cancer and 61 salivary rinses from healthy individuals (Figure 4). The specificity and sensitivity values showing the power of our candidate markers were given in Table 2.

In salivary rinse samples collected from patients before any treatment, *KIF1A* was methylated in 38% [27/71, mean±sd=1.76±0.62, median (range)=0 (0, 3.96)] and *EDNRB* in 67.6% [48/71, mean±sd=5.48±2.18, median (range)=0.06 (0, 120.5)] of samples

1  
2  
3  
4 whereas in salivary rinses from healthy people, these genes were methylated infrequently,  
5  
6 2% [1/47 (missing n=14), mean±sd=0.1835±0.072, median (range)= 0 (0, 0.12)] for  
7  
8 *KIF1A* and 6.6% [3/45 (missing n=16), mean±sd=0.0123±0.007, median (range)=0 (0,  
9  
10 0.2)] for *EDNRB* (p<0.0001, Wilcoxon rank test of methylation levels for both genes).  
11  
12 We also checked the correlation between *KIF1A* and *EDNRB* methylation levels. In  
13  
14 tumor samples (n=101), *KIF1A* and *EDNRB* were positively correlated (r=0.33,  
15  
16 p=0.0007) but in pre-treatment salivary rinse samples (n=71) no significant correlation  
17  
18 between *KIF1A* and *EDNRB* was seen (p>0.3).  
19  
20  
21  
22  
23

### 24 **Correlation with Clinical Characteristics**

25  
26  
27 We have sought correlation between the methylation status of these two genes in  
28  
29 primary tumor samples with clinical parameters of HNSCC patients (n=101). We found a  
30  
31 significant association between *KIF1A* levels and tumor site (Table S3). Patients with  
32  
33 tumor in oral cavity (n=39), larynx (n=15) and maxillary sinus (n=2) had significantly  
34  
35 higher *KIF1A* methylation level (mean±sd;27.0±4.0) than patients with other tumor sites  
36  
37 (n=45, mean±sd;8.4±2.0, p=0.0009).  
38  
39

40  
41 There was no significant association between *KIF1A* methylation level in HNSCC  
42  
43 patients` salivary rinses and other clinical features, although 48 patients who were current  
44  
45 or former smokers had lower *EDNRB* levels (mean±sd;2.3±1.1) than 22 non-smokers  
46  
47 (mean±sd;12.6±6.4, p=0.0266, Wilcoxon rank test). No significant difference in mortality  
48  
49 was found between patients with methylated *KIF1A* or *EDNRB* salivary rinses and  
50  
51 patients without *KIF1A* and *EDNRB* methylation.  
52  
53  
54  
55  
56  
57  
58  
59  
60

1  
2  
3 For HNSCC patients, both in primary tumors and salivary rinses, poorer survival  
4 was associated with age (Tables S4,S5), overall stage and tumor site in univariate  
5 analysis, and all three factors remained significant on multivariate analysis, but there was  
6 no association with survival and *KIF1A* and/or *EDNRB* methylation status and clinical  
7 outcome ( Table S5, Figures S1-S3).  
8  
9  
10  
11  
12  
13  
14  
15  
16  
17

## 18 DISCUSSION

19  
20 We evaluated the utility of detection of aberrant promoter methylation of these  
21 genes in the salivary rinses from cancer patients compared with normal population as a  
22 detection tool. Methylation of the *KIF1A* and *EDNRB* gene promoters is a frequent event  
23 in HNSCC with these genes being infrequently and minimally methylated in normal  
24 salivary rinses, demonstrating potential for these genes as biomarkers in detection  
25 strategies. To obtain an accurate determination of methylation status in a cohort of  
26 normal individuals, we chose to assess the presence of methylated signal in exfoliated  
27 upper aerodigestive cells obtained during a screening study in a control population. The  
28 sample collected using this technique includes exfoliated epithelial cells from the upper  
29 aerodigestive tract obtained during a rinse and gargle, and cells from the deep epithelial  
30 layers from the oral cavity and oropharynx by using the exfoliating brush. This technique  
31 allows for a broad sampling of epithelial cells from multiple sites in the upper  
32 aerodigestive tract.  
33  
34  
35  
36  
37  
38  
39  
40  
41  
42  
43  
44  
45  
46  
47  
48  
49

50 *KIF1A* (Kinesin family member 1A) encodes a protein that is microtubule-  
51 dependent molecular motor involved in important intracellular functions such as  
52 organelle transport and cell division<sup>24</sup>. This protein is highly similar to mouse heavy  
53  
54  
55  
56  
57  
58  
59  
60

1  
2  
3 chain kinesin member 1A protein which is an anterograde motor protein that transports  
4  
5 membranous organelles along axonal microtubules. It is thought that this protein may  
6  
7 play a critical role in the development of axonal neuropathies resulting from impaired  
8  
9 axonal transport <sup>25</sup>.

10  
11  
12 *EDNRB* (Endothelin receptor type B) is a G protein-coupled receptor which  
13  
14 activates a phosphatidylinositol-calcium second messenger system. Its ligand, endothelin,  
15  
16 consists of a family of three potent vasoactive peptides: ET1, ET2, and ET3. Studies  
17  
18 suggest that the multigenic disorder, Hirschsprung disease type 2, is due to mutation in  
19  
20 endothelin receptor type B gene <sup>26</sup>.

21  
22  
23  
24  
25 There are only two previous publications from our group, showing the  
26  
27 methylation status of *KIF1A* gene in human cancers <sup>18,21</sup>. The promoter methylation  
28  
29 status of *EDNRB* gene was studied previously in bladder <sup>27,28</sup>, renal <sup>29</sup>, prostate <sup>19,30</sup>, lung  
30  
31 <sup>31</sup>, medullablastoma <sup>32</sup> and hepatocellular carcinoma <sup>33</sup>. Two reports have been published  
32  
33 focusing on *EDNRB* methylation in nasopharyngeal carcinoma <sup>34,35</sup> but none involving  
34  
35 the other head and neck sites.  
36  
37

38  
39 In our study, methylation levels of both genes were very low in tissue specimens  
40  
41 from healthy normal individuals even though a majority of these samples revealed a  
42  
43 certain level of methylation in *EDNRB* or *KIF1A* gene promoters (>13 individuals from  
44  
45 the cohort of 15). However when analyzed in salivary rinses from healthy individuals,  
46  
47 methylation of these two genes was not frequent (1/47, 2% for *KIF1A* and 3/45, 6.6% for  
48  
49 *EDNRB*). Moreover, markedly increased levels of methylation in pre-treatment salivary  
50  
51 rinses from HNSCC patients strongly demonstrates the potential of measuring  
52  
53 methylation levels in salivary rinse samples as a non-invasive approach for detection of  
54  
55  
56  
57  
58  
59  
60



1  
2  
3 HNSCC. We were able to show that *KIF1A* (97.8% specificity and 36.6% sensitivity) and  
4  
5 EDNRB (93.2% specificity and 67.6% sensitivity) are highly sensitive markers that could  
6  
7 potentially be used for molecular detection strategies. In addition, combining the markers  
8  
9 improves sensitivity while maintains good specificity (93.1% specificity and 77.4%  
10  
11 sensitivity). We have previously reported <sup>7</sup> that using a panel of 4 different genes  
12  
13 (MINT31, MGMT, CCNA1, p16), methylation detection sensitivity in salivary rinses of  
14  
15 HNSCC patients improved to 35% without significantly compromising the specificity  
16  
17 (90%). We were interested in defining new genes that would be of utility in molecular  
18  
19 detection strategies, hence we evaluated a panel of 10 additional genes that are frequently  
20  
21 methylated in other tumor types as has been previously reported in the literature and so  
22  
23 were considered separately from our previously reported cohort. This study demonstrates  
24  
25 an increase of sensitivity with similar specificity using a panel of only two genes. The  
26  
27 methylation detection of these two genes has potential to be developed as a non-invasive  
28  
29 tool for HNSCC detection screening. Promoter hypermethylation patterns in individual  
30  
31 tumors show variation depending on specific altered molecular pathways and so it is  
32  
33 anticipated that the use of more than one gene will provide greater applicability and  
34  
35 coverage for diverse tumors when compared with a single gene for cancer detection.  
36  
37  
38  
39  
40  
41  
42  
43  
44

#### 45 46 **ACKNOWLEDGEMENT**

47  
48 Dr. Califano is supported by a Clinical Innovator Award from the Flight Attendant  
49  
50 Medical Research Institute.

51  
52 This work was supported by a SPORE grant – P50 CA96784.

53  
54 We would like to thank Steven Li (MS), Oluwasina Folawiyo (BS), Simy Buckwold  
55  
56 (MS) and Andrew Chou (BS) for the technical help.  
57  
58  
59  
60

### Disclosure of Potential Conflicts of Interest

Under a licensing agreement between Oncomethylome Sciences, SA and The Johns Hopkins University, D. Sidransky is entitled to a share of royalty received by the University upon sales of diagnostic products described in this article. D. Sidransky owns Oncomethylome Sciences, SA stock, which is subject to certain restrictions under University policy. Dr. Sidransky is a paid consultant to Oncomethylome Sciences, SA and is a paid member of the company's Scientific Advisory Board. The Johns Hopkins University in accordance with its conflict of interest policies is managing the terms of this agreement.

## REFERENCES

1. Jemal A, Siegel R, Ward E, Murray T, Xu J, Smigal C, Thun MJ. Cancer statistics, 2006. *CA Cancer J Clin* 2006;56:106-30.
2. Palmisano WA, Divine KK, Saccomanno G, Gilliland FD, Baylin SB, Herman JG, Belinsky SA. Predicting lung cancer by detecting aberrant promoter methylation in sputum. *Cancer Res* 2000;60:5954-8.
3. Hoque MO, Begum S, Topaloglu O, Jeronimo C, Mambo E, Westra WH, Califano JA, Sidransky D. Quantitative detection of promoter hypermethylation of multiple genes in the tumor, urine, and serum DNA of patients with renal cancer. *Cancer Res* 2004;64:5511-7.
4. Nunes DN, Kowalski LP, Simpson AJ. Detection of oral and oropharyngeal cancer by microsatellite analysis in mouth washes and lesion brushings. *Oral Oncol* 2000;36:525-8.
5. Rosas SL, Koch W, da Costa Carvalho MG, Wu L, Califano J, Westra W, Jen J, Sidransky D. Promoter hypermethylation patterns of p16, O6-methylguanine-DNA-methyltransferase, and death-associated protein kinase in tumors and saliva of head and neck cancer patients. *Cancer Res* 2001;61:939-42.
6. El-Naggar AK, Mao L, Staerkel G, Coombes MM, Tucker SL, Luna MA, Clayman GL, Lippman S, Goepfert H. Genetic heterogeneity in saliva from patients with oral squamous carcinomas: implications in molecular diagnosis and screening. *J Mol Diagn* 2001;3:164-70.
7. Carvalho AL, Jeronimo C, Kim MM, Henrique R, Zhang Z, Hoque MO, Chang S, Brait M, Nayak CS, Jiang WW, Claybourne Q, Tokumaru Y, et al. Evaluation of

- 1  
2  
3 promoter hypermethylation detection in body fluids as a screening/diagnosis tool  
4  
5 for head and neck squamous cell carcinoma. *Clin Cancer Res* 2008;14:97-107.  
6  
7
- 8 8. Lee A, Kim Y, Han K, Kang CS, Jeon HM, Shim SI. Detection of tumor markers  
9 including carcinoembryonic antigen, APC, and cyclin D2 in fine-needle aspiration  
10 fluid of breast. *Arch Pathol Lab Med* 2004;128:1251-6.  
11  
12
- 13 9. Usadel H, Brabender J, Danenberg KD, Jerónimo C, Harden S, Engles J,  
14 Danenberg PV, Yang S, Sidransky D. Quantitative adenomatous polyposis coli  
15 promoter methylation analysis in tumor tissue, serum, and plasma DNA of  
16 patients with lung cancer. *Cancer Res* 2002;62:371-5.  
17  
18
- 19 10. Hu S, Ewertz M, Tufano RP, Brait M, Carvalho AL, Liu D, Tufaro AP, Basaria S,  
20 Cooper DS, Sidransky D, Ladenson PW, Xing M. Detection of serum  
21 deoxyribonucleic acid methylation markers: a novel diagnostic tool for thyroid  
22 cancer. *J Clin Endocrinol Metab* 2006;91:98-104.  
23  
24
- 25 11. Sanchez-Cespedes M, Esteller M, Wu L, Nawroz-Danish H, Yoo GH, Koch WM,  
26 Jen J, Herman JG, Sidransky D. Gene promoter hypermethylation in tumors and  
27 serum of head and neck cancer patients. *Cancer Res* 2000;60:892-5.  
28  
29
- 30 12. Wong IH, Zhang J, Lai PB, Lau WY, Lo YM. Quantitative analysis of tumor-  
31 derived methylated p16INK4a sequences in plasma, serum, and blood cells of  
32 hepatocellular carcinoma patients. *Clin Cancer Res* 2003;9:1047-52.  
33  
34
- 35 13. Wadsworth JT, Somers KD, Stack BC Jr, Cazares L, Malik G, Adam BL, Wright  
36 GL Jr, Semmes OJ. Identification of patients with head and neck cancer using  
37 serum protein profiles. *Arch Otolaryngol Head Neck Surg* 2004;130:98-104.  
38  
39  
40  
41  
42  
43  
44  
45  
46  
47  
48  
49  
50  
51  
52  
53  
54  
55  
56  
57  
58  
59  
60

- 1  
2  
3  
4  
5  
6  
7  
8  
9  
10  
11  
12  
13  
14  
15  
16  
17  
18  
19  
20  
21  
22  
23  
24  
25  
26  
27  
28  
29  
30  
31  
32  
33  
34  
35  
36  
37  
38  
39  
40  
41  
42  
43  
44  
45  
46  
47  
48  
49  
50  
51  
52  
53  
54  
55  
56  
57  
58  
59  
60
14. Bernard PS, Wittwer CT. Real-time PCR technology for cancer diagnostics. *Clin Chem* 2002;48:1178-85.
15. Eads CA, Danenberg KD, Kawakami K, Saltz LB, Blake C, Shibata D, Danenberg PV, Laird PW. MethyLight: a high-throughput assay to measure DNA methylation. *Nucleic Acids Res* 2000;28:E32.
16. Cottrell SE, Laird PW. Sensitive detection of DNA methylation. *Ann N Y Acad Sci* 2003;983:120-30.
17. Jerónimo C, Usadel H, Henrique R, Oliveira J, Lopes C, Nelson WG, Sidransky D. Quantitation of GSTP1 methylation in non-neoplastic prostatic tissue and organ-confined prostate adenocarcinoma. *J Natl Cancer Inst* 2001;93:1747-52.
18. Hoque MO, Kim MS, Ostrow KL, Liu J, Wisman GB, Park HL, Poeta ML, Jeronimo C, Henrique R, Lendvai A, Schuurin E, Begum S, et al. Genome-wide promoter analysis uncovers portions of the cancer methylome. *Cancer Res* 2008;68:2661-70.
19. Woodson K, Gillespie J, Hanson J, Emmert-Buck M, Phillips JM, Linehan WM, Tangrea JA. Heterogeneous gene methylation patterns among pre-invasive and cancerous lesions of the prostate: a histopathologic study of whole mount prostate specimens. *Prostate* 2004;60:25-31.
20. Pu RT, Sheng ZM, Michael CW, Rhode MG, Clark DP, O'Leary TJ. Methylation profiling of mesothelioma using real-time methylation-specific PCR: a pilot study. *Diagn Cytopathol* 2007;35:498-502.

- 1  
2  
3  
4  
5  
6  
7  
8  
9  
10  
11  
12  
13  
14  
15  
16  
17  
18  
19  
20  
21  
22  
23  
24  
25  
26  
27  
28  
29  
30  
31  
32  
33  
34  
35  
36  
37  
38  
39  
40  
41  
42  
43  
44  
45  
46  
47  
48  
49  
50  
51  
52  
53  
54  
55  
56  
57  
58  
59  
60
21. Ostrow KL, Park HL, Hoque MO, Kim MS, Liu J, Argani P, Westra W, Van Criekinge W, Sidransky D. Pharmacologic unmasking of epigenetically silenced genes in breast cancer. *Clin Cancer Res* 2009;15:1184-91.
  22. Park HL, Kim MS, Yamashita K, Westra W, Carvalho AL, Lee J, Jiang WW, Baek JH, Liu J, Osada M, Moon CS, Califano JA, et al. DCC promoter hypermethylation in esophageal squamous cell carcinoma. *Int J Cancer* 2008;122:2498-502.
  23. Miotto E, Sabbioni S, Veronese A, Calin GA, Gullini S, Liboni A, Gramantieri L, Bolondi L, Ferrazzi E, Gafà R, Lanza G, Negrini M. Frequent aberrant methylation of the CDH4 gene promoter in human colorectal and gastric cancer. *Cancer Res* 2004;64:8156-9.
  24. Okada Y, Yamazaki H, Sekine-Aizawa Y, Hirokawa N. The neuron-specific kinesin superfamily protein KIF1A is a unique monomeric motor for anterograde axonal transport of synaptic vesicle precursors. *Cell* 1995;81:769-80.
  25. Yonekawa Y, Harada A, Okada Y, Funakoshi T, Kanai Y, Takei Y, Terada S, Noda T, Hirokawa N. Defect in synaptic vesicle precursor transport and neuronal cell death in KIF1A motor protein-deficient mice. *J Cell Biol* 1998;141:431-41.
  26. Smollich M, Wülfing P. Targeting the endothelin system: novel therapeutic options in gynecological, urological and breast cancers. *Expert Rev Anticancer Ther* 2008;8:1481-93.
  27. Yates DR, Rehman I, Abbod MF, Meuth M, Cross SS, Linkens DA, Hamdy FC, Catto JW. Promoter hypermethylation identifies progression risk in bladder cancer. *Clin Cancer Res* 2007;13:2046-53.

- 1  
2  
3  
4  
5  
6  
7  
8  
9  
10  
11  
12  
13  
14  
15  
16  
17  
18  
19  
20  
21  
22  
23  
24  
25  
26  
27  
28  
29  
30  
31  
32  
33  
34  
35  
36  
37  
38  
39  
40  
41  
42  
43  
44  
45  
46  
47  
48  
49  
50  
51  
52  
53  
54  
55  
56  
57  
58  
59  
60
28. Friedrich MG, Chandrasoma S, Siegmund KD, Weisenberger DJ, Cheng JC, Toma MI, Huland H, Jones PA, Liang G. Prognostic relevance of methylation markers in patients with non-muscle invasive bladder carcinoma. *Eur J Cancer* 2005;41:2769-78.
29. Yao M, Huang Y, Shioi K, Hattori K, Murakami T, Sano F, Baba M, Kondo K, Nakaigawa N, Kishida T, Nagashima Y, Yamada-Okabe H, et al. A three-gene expression signature model to predict clinical outcome of clear cell renal carcinoma. *Int J Cancer* 2008;123:1126-32.
30. Rogers CG, Gonzalgo ML, Yan G, Bastian PJ, Chan DY, Nelson WG, Pavlovich CP. High concordance of gene methylation in post-digital rectal examination and post-biopsy urine samples for prostate cancer detection. *J Urol* 2006;176:2280-4.
31. Chen SC, Lin CY, Chen YH, Fang HY, Cheng CY, Chang CW, Chen RA, Tai HL, Lee CH, Chou MC, Lin TS, Hsu LS. Aberrant promoter methylation of EDNRB in lung cancer in Taiwan. *Oncol Rep* 2006;15:167-72.
32. Lindsey JC, Lusher ME, Anderton JA, Bailey S, Gilbertson RJ, Pearson AD, Ellison DW, Clifford SC. Identification of tumour-specific epigenetic events in medulloblastoma development by hypermethylation profiling. *Carcinogenesis* 2004;25:661-8.
33. Hsu LS, Lee HC, Chau GY, Yin PH, Chi CW, Lui WY. Aberrant methylation of EDNRB and p16 genes in hepatocellular carcinoma (HCC) in Taiwan. *Oncol Rep* 2006;15:507-11.

- 1  
2  
3  
4 34. Lo KW, Tsang YS, Kwong J, To KF, Teo PM, Huang DP. Promoter  
5  
6 hypermethylation of the EDNRB gene in nasopharyngeal carcinoma. Int J Cancer  
7  
8 2002;98:651-5.  
9
- 10 35. Zhou L, Feng X, Shan W, Zhou W, Liu W, Wang L, Zhu B, Yi H, Yao K, Ren C.  
11  
12 Epigenetic and genetic alterations of the EDNRB gene in nasopharyngeal  
13  
14 carcinoma. Oncology 2007;72:357-63.  
15  
16  
17  
18  
19  
20  
21  
22  
23  
24  
25  
26  
27  
28  
29  
30  
31  
32  
33  
34  
35  
36  
37  
38  
39  
40  
41  
42  
43  
44  
45  
46  
47  
48  
49  
50  
51  
52  
53  
54  
55  
56  
57  
58  
59  
60

For Peer Review



TABLE 1 - DEMOGRAPHICS OF STUDY PATIENTS

|                 | Head and Neck Cancer<br>Tumor Samples<br>(N = 101) | Normal Mucosa<br>Samples<br>(N = 15) | Head and Neck Cancer<br>Salivary Rinse Samples<br>(N = 71) | Normal Salivary Rinse<br>Samples<br>(N = 61) |
|-----------------|----------------------------------------------------|--------------------------------------|------------------------------------------------------------|----------------------------------------------|
| Age             |                                                    |                                      |                                                            |                                              |
| Mean            | 56.9 ± 12.9 (31-88)                                | 43.2 ± 14.6 (22-65)                  | 57.2 ± 12.0 (31-87)                                        | 51.8 ± 14.3 (19-80)                          |
| Sex             |                                                    |                                      |                                                            |                                              |
| Male            | 78 (77%)                                           | 10 (67%)                             | 55 (77%)                                                   | 36 (59%)                                     |
| Female          | 23 (23%)                                           | 3 (20%)                              | 16 (23%)                                                   | 25 (41%)                                     |
| Race            |                                                    |                                      |                                                            |                                              |
| Caucasian       | 86 (85%)                                           | 10 (67%)                             | 61 (86%)                                                   | 37 (61%)                                     |
| Black           | 12 (12%)                                           | ?                                    | 8 (11%)                                                    | 21 (34%)                                     |
| Other           | 3 (3%)                                             | 1 (7%)                               | 2 (3%)                                                     | 3 (5%)                                       |
| Smoking status  |                                                    |                                      |                                                            |                                              |
| Never           | 32 (33%)                                           | 9 (60%)                              | 22 (31%)                                                   | 29 (47%)                                     |
| Former          | 30 (29%)                                           | 5 (33%)                              | 22 (31%)                                                   | 20 (33%)                                     |
| Current         | 32 (31%)                                           | 0 (0%)                               | 26 (37%)                                                   | 11 (18%)                                     |
| Unknown         | 7 (7%)                                             | 1 (7%)                               | 1 (1%)                                                     | 1 (2%)                                       |
| Alcohol status  |                                                    |                                      |                                                            |                                              |
| Never           | 20 (20%)                                           | 10 (66%)                             | 14 (20%)                                                   | 14 (23%)                                     |
| Former          | 20 (20%)                                           | 1 (7%)                               | 18 (25%)                                                   | 11 (18%)                                     |
| Current         | 39 (38%)                                           | 3 (20%)                              | 24 (34%)                                                   | 30 (49%)                                     |
| Unknown         | 22 (22%)                                           | 1 (7%)                               | 15 (21%)                                                   | 6 (10%)                                      |
| Stage           |                                                    |                                      |                                                            |                                              |
| I               | 18 (18%)                                           | -                                    | 13 (18%)                                                   | -                                            |
| II              | 16 (16%)                                           | -                                    | 10 (14%)                                                   | -                                            |
| III             | 12 (12%)                                           | -                                    | 10 (14%)                                                   | -                                            |
| IV              | 55 (54%)                                           | -                                    | 38 (54%)                                                   | -                                            |
| Site            |                                                    |                                      |                                                            |                                              |
| Oral Cavity     | 39 (38%)                                           | -                                    | 19 (27%)                                                   | -                                            |
| Oropharynx      | 38 (38%)                                           | -                                    | 30 (42%)                                                   | -                                            |
| Hypopharynx     | 5 (5%)                                             | -                                    | 5 (7%)                                                     | -                                            |
| Larynx          | 15 (15%)                                           | -                                    | 13 (18%)                                                   | -                                            |
| Neck/Other      | 2 (2%)                                             | -                                    | 2 (3%)                                                     | -                                            |
| Maxillary Sinus | 2 (2%)                                             | -                                    | 2 (3%)                                                     | -                                            |

256x232mm (72 x 72 DPI)

**Table 2:** Comparison of hypermethylation detection on salivary rinses from patients with HNSCC and healthy control samples.

| <b>Genes</b>                | <b>Sensitivity*, % (95% CI)</b> | <b>Specificity*, % (95% CI)</b> |
|-----------------------------|---------------------------------|---------------------------------|
| <b><i>KIF1A</i></b>         | <b>36.60 (22.70-50.50)</b>      | <b>97.80 (94.40-100)</b>        |
| <b><i>EDNRB</i></b>         | <b>67.60 (53.80-81.40)</b>      | <b>93.20 (87.30-99.0)</b>       |
| <b><i>KIF1A + EDNRB</i></b> | <b>77.40 (62.20-92.70)</b>      | <b>93.10 (87.20-99.0)</b>       |

\* The cutoff point is zero for both *KIF1A* and *EDNRB*.

224x82mm (72 x 72 DPI)

Peer Review

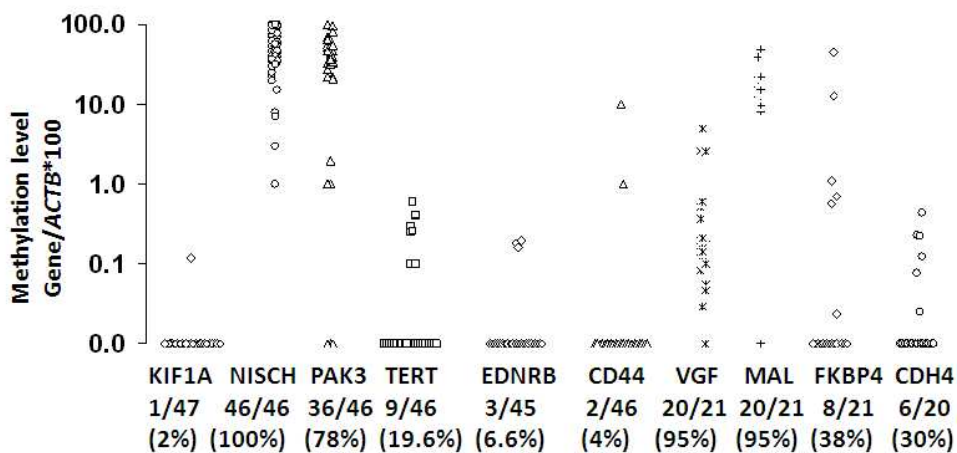

Figure 1: The relative methylation frequencies of candidate genes in normal salivary samples.

Scatter plots of QMSP analysis of candidate gene promoters.

X axis, proportion of methylated cases/tested cases for each gene;

Y axis, quantity of hypermethylation (gene of interest/ACTBx100).

283x153mm (72 x 72 DPI)

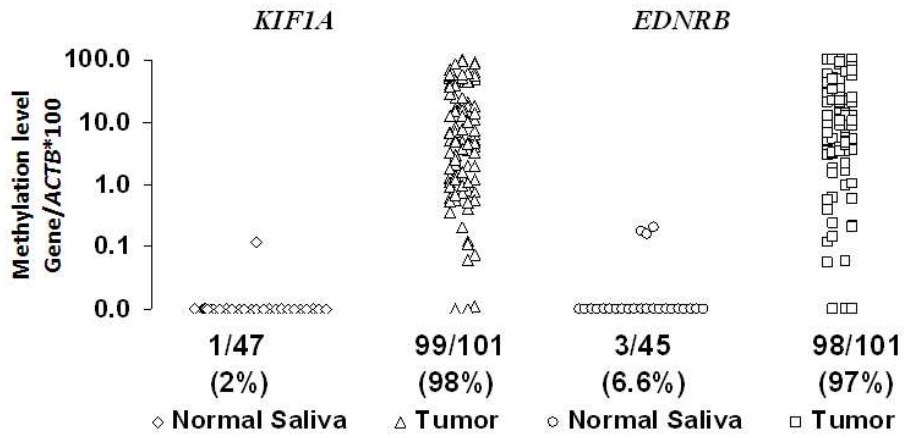

Figure 2: Patterns of hypermethylation of KIF1A and EDNRB genes observed in DNA from tumor samples of patients with HNSCC and salivary rinses from healthy population. X axis, proportion of methylated cases/tested cases for each sample type; Y axis, quantity of hypermethylation (gene of interest/ACTBx100). 288x143mm (72 x 72 DPI)

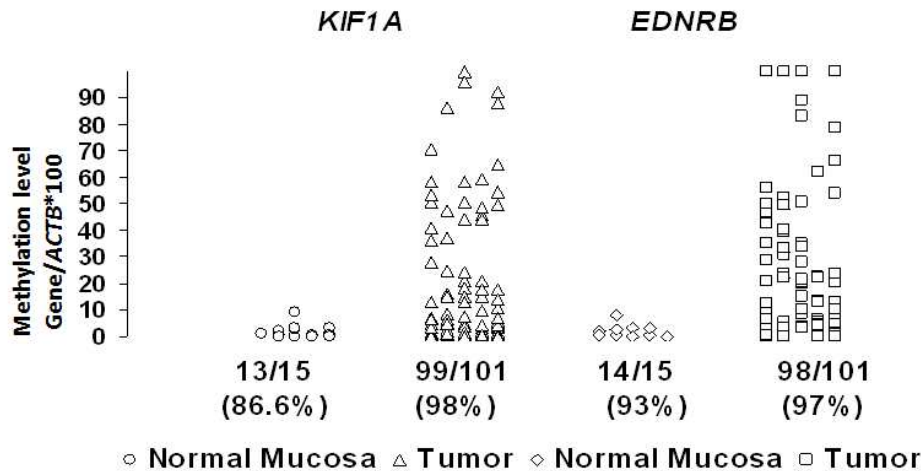

|                     | mean  | median | P*      |
|---------------------|-------|--------|---------|
| KIF1A_tumor         | 18.57 | 5.02   |         |
| KIF1A_normal mucosa | 1.76  | 0.66   | 0.0004  |
| EDNRB_tumor         | 27    | 10.4   |         |
| EDNRB_normal mucosa | 1.55  | 0.49   | <0.0001 |

\*Wilcoxon rank test

Figure 3: The methylation rates on KIF1A and EDNRB in 101 fresh tumor samples of patients with HNSCC and 15 normal mucosa from healthy individuals.

X axis, proportion of methylated cases/tested cases for each sample type;

Y axis, quantity of hypermethylation (gene of interest/ACTBx100).

287x240mm (72 x 72 DPI)

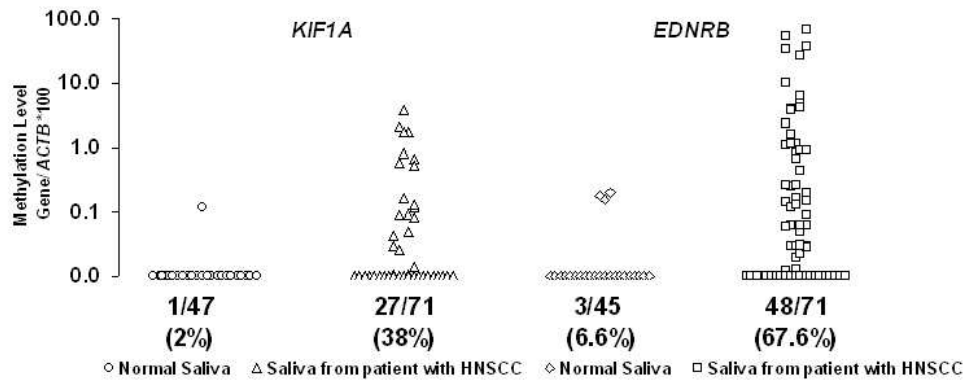

Figure 4: Patterns of hypermethylation on KIF1A and EDNRB in 71 salivary rinses from patients with HNSCC collected before any treatment and 61 normal salivary rinse samples from healthy individuals.

X axis, proportion of methylated cases/tested cases for each sample type;  
 Y axis, quantity of hypermethylation (gene of interest/ACTBx100).  
 272x130mm (72 x 72 DPI)
